# Supplementary material for: Per-Feature Accuracy of Liver Imaging Reporting and Data System Locoregional Treatment Response Algorithm: A Systematic Review and Meta-Analysis
Source: MDPI journal article supplement (doi:10.3390/cancers13174432), 2021-09-02
Supplement: s1 [file s1]

# Supplementary Materials: Per-Feature Accuracy of Liver Imaging Reporting and Data System Locoregional Treatment Response Algorithm: A Systematic Review and Meta-Analysis

Yeon Jong Huh, Dong Hwan Kim, Bohyun Kim, Joon-Il Choi and Sung Eun Rha

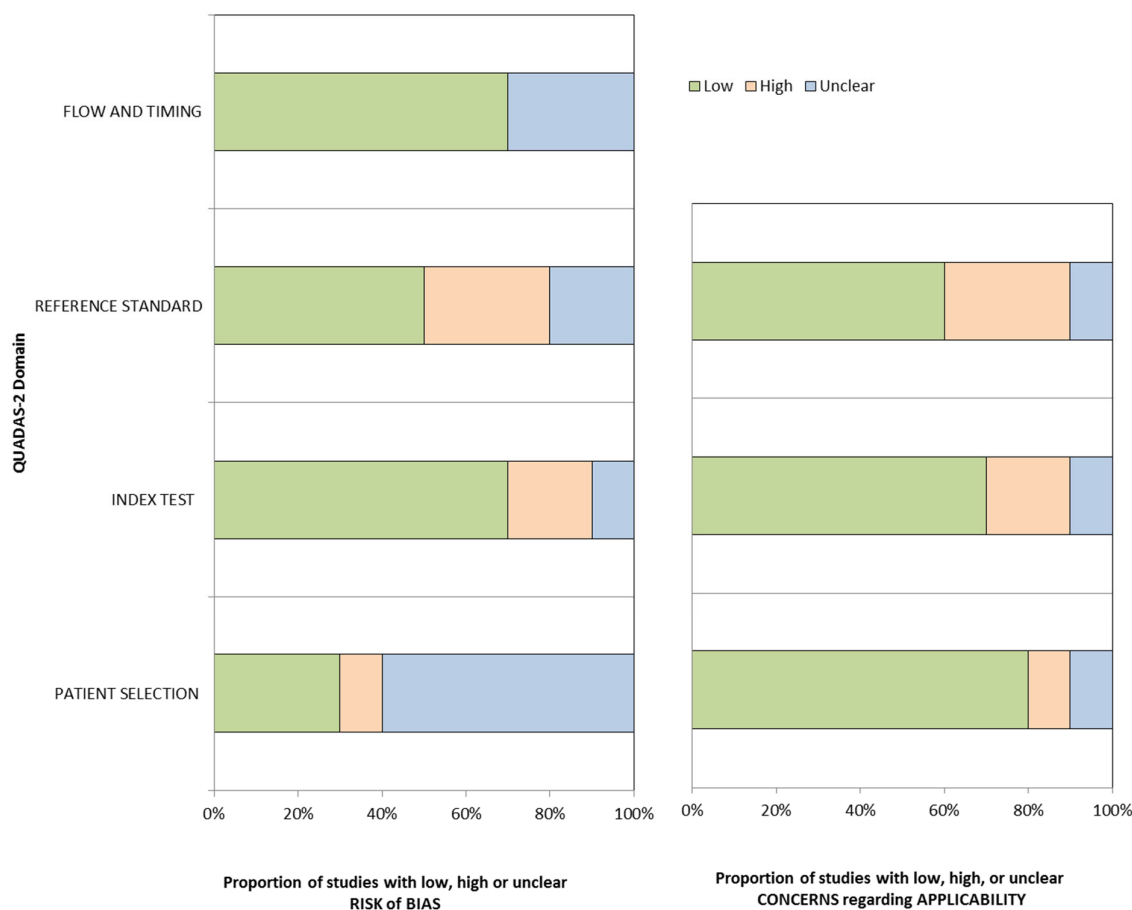

**Figure S1.** Results of quality assessments of the articles according to QUADAS-2 criteria. The methodological quality distribution of the articles is presented as the proportions of articles (0–100%) with a low (i.e., high quality), high, and unclear risk of bias and the proportions of articles with low (i.e., high quality), high, or unclear concerns regarding applicability for each domain.

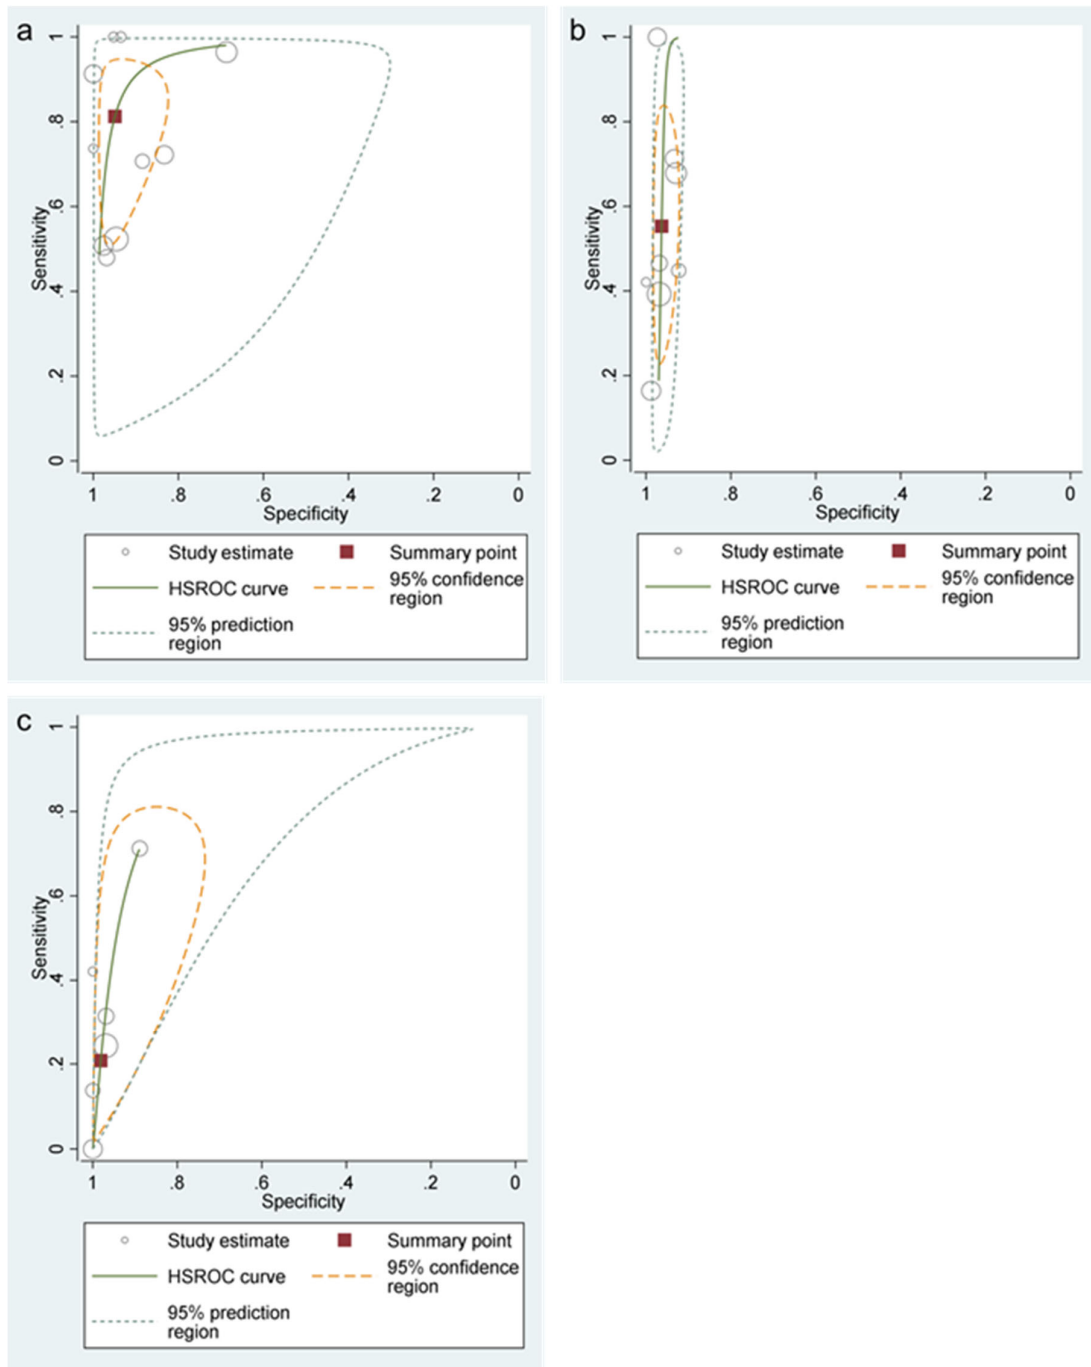

**Figure S2.** Hierarchical summary receiver operating characteristic curves for the accuracy of arterial phase hyperenhancement (a), washout appearance (b), or enhancement similar to pretreatment (c).

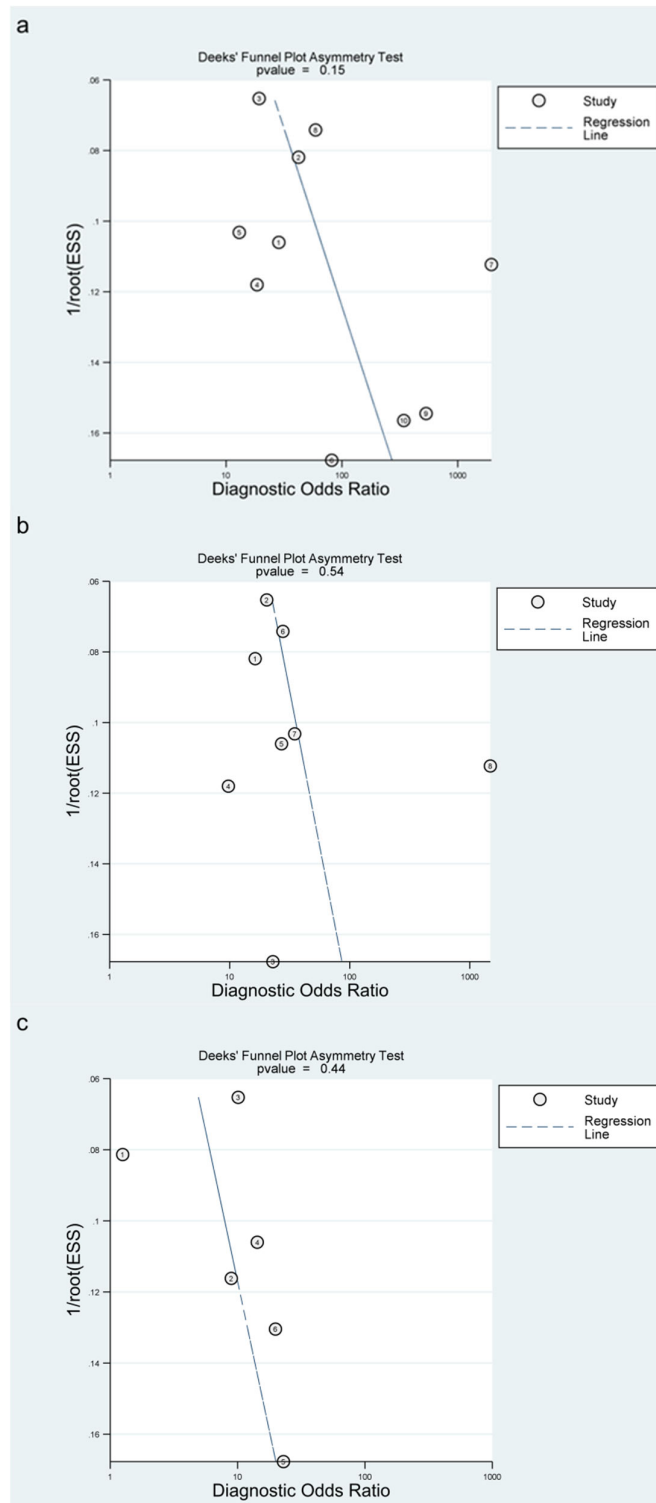

**Figure S3.** Deeks' funnel plot to evaluate publication bias regarding arterial phase hyperenhancement (a), washout appearance (b), or enhancement similar to pretreatment (c).

**Table S1.** Search queries.

| No. | Search Queries for MEDLINE                                                                        |
|-----|---------------------------------------------------------------------------------------------------|
| #1  | ("Liver Neoplasms"[Mesh] OR "Liver"[Mesh]) AND "Radiology Information Systems"[mesh]              |
| #2  | "LI-RADS"[TW] OR "LR-TR"[TW] OR "liver imaging reporting"[TW] OR "LI-RADS Treatment Response"[TW] |
| #3  | #1 OR #2                                                                                          |
| #4  | Magnetic Resonanc*[TW] OR MRI[TW] OR MR[TW] OR CT[TW] OR Computed Tomography[TW]                  |
| #5  | #3 AND #4                                                                                         |
| #6  | #5 AND English[Lang] AND ("2017/01/01"[PDAT]: "3000/12/31"[PDAT])                                 |
| No. | Search queries for EMBASE                                                                         |
| #1  | 'liver imaging reporting and data system'/exp                                                     |
| #2  | ('LI-RADS' OR 'LR-TR' OR 'liver imaging reporting' OR 'LI-RADS Treatment Response'):ab,ti,kw      |
| #3  | #1 OR #2                                                                                          |
| #4  | ('Magnetic Resonanc*' OR MRI OR MR OR CT OR 'Computed Tomography'):ab,ti,kw                       |
| #5  | #3 AND #4                                                                                         |
| #6  | #5 AND [english]/lim AND [2017-2021]/py                                                           |

**Table S2.** Numbers of true positives, false positives, false negatives, and true negatives of each imaging feature of LR-TR viable category for diagnosing viable HCC.

| Imaging Feature                                 | Author (Publication Year) | Total Number of Observations | Number of Observations |    |    |     |
|-------------------------------------------------|---------------------------|------------------------------|------------------------|----|----|-----|
|                                                 |                           |                              | TP                     | FP | FN | TN  |
| NMLIT with APHE                                 | Saleh TY (2019)           | 40                           | 19                     | 1  | 0  | 20  |
|                                                 | Kim SW (2020)             | 183                          | 81                     | 31 | 3  | 68  |
|                                                 | Seo N (2020)              | 84                           | 41                     | 3  | 17 | 23  |
|                                                 | Park S (2020)             | 138                          | 78                     | 5  | 30 | 25  |
|                                                 | Bae JS (2021)             | 237                          | 56                     | 7  | 51 | 123 |
|                                                 | Granata V (2021)          | 136                          | 21                     | 0  | 2  | 113 |
|                                                 | Huh J (2021)              | 151                          | 34                     | 2  | 33 | 82  |
|                                                 | Mahmoud BE (2021)         | 45                           | 14                     | 2  | 0  | 29  |
|                                                 | Yoon J (2021)             | 34                           | 14                     | 0  | 5  | 15  |
|                                                 | Youn SY (2021)            | 105                          | 35                     | 1  | 38 | 31  |
| NMLIT with washout appearance                   | Kim SW (2020)             | 183                          | 57                     | 7  | 27 | 92  |
|                                                 | Seo N (2020)              | 84                           | 26                     | 2  | 32 | 24  |
|                                                 | Park S (2020)             | 138                          | 77                     | 2  | 31 | 28  |
|                                                 | Bae JS (2021)             | 237                          | 42                     | 4  | 65 | 126 |
|                                                 | Granata V (2021)          | 136                          | 23                     | 3  | 0  | 110 |
|                                                 | Huh J (2021)              | 151                          | 11                     | 1  | 56 | 83  |
|                                                 | Yoon J (2021)             | 34                           | 8                      | 0  | 11 | 15  |
|                                                 | Youn SY (2021)            | 105                          | 34                     | 1  | 39 | 31  |
| NMLIT with enhancement similar to pre-treatment | Seo N (2020)              | 84                           | 8                      | 0  | 50 | 26  |
|                                                 | Park S (2020)             | 98                           | 57                     | 2  | 23 | 16  |
|                                                 | Bae JS (2021)             | 237                          | 26                     | 4  | 81 | 126 |
|                                                 | Huh J (2021)              | 151                          | 0                      | 0  | 67 | 84  |
|                                                 | Yoon J (2021)             | 34                           | 8                      | 0  | 11 | 15  |
|                                                 | Youn SY (2021)            | 105                          | 23                     | 1  | 50 | 31  |

LR-TR, Liver Imaging Reporting and Data System treatment response; HCC, hepatocellular carcinoma; NMLIT, nodular, mass-like, or irregular thick tissue in or along the treated lesion; APHE, arterial phase hyperenhancement; TP, true positive; FP, false positive; FN, false negative; TN, true negative.
